# A novel Bayesian fine-mapping model using a continuous global-local shrinkage prior with applications in prostate cancer analysis

Xiang Li<sup>1</sup>, Pak Chung Sham<sup>2,3</sup>, Yan Dora Zhang<sup>1\*</sup>

<sup>1</sup>Department of Statistics and Actuarial Science, The University of Hong Kong, Hong Kong SAR, China.

<sup>2</sup>Department of Psychiatry, Li Ka Shing Faculty of Medicine, The University of Hong Kong, Hong Kong SAR, China.

<sup>3</sup>Centre for PanorOmic Sciences, Li Ka Shing Faculty of Medicine, The University of Hong Kong, Hong Kong SAR, China.

\*Corresponding author(s). E-mail(s): [doraz@hku.hk](mailto:doraz@hku.hk);

Contributing authors: [freddyl@connect.hku.hk](mailto:freddyl@connect.hku.hk); [pcsham@hku.hk](mailto:pcsham@hku.hk);

## Abstract

The aim of fine-mapping is to identify genetic variants causally contributing to complex traits or diseases. Existing fine-mapping methods employ discrete Bayesian mixture priors and depend on a pre-specified maximum number of causal variants which may lead to sub-optimal solutions. In this work, we propose a novel fine-mapping method called h2-D2, utilizing a continuous global-local shrinkage prior. We also present an approach to define credible sets of causal variants in continuous prior settings. Simulation studies demonstrate that h2-D2 outperforms the state-of-art fine-mapping methods such as SuSiE and FINEMAP in accurately identifying causal variants and estimating their effect sizes. We further applied h2-D2 to prostate cancer analysis and discovered some previously unknown causal variants. In addition, we inferred 385 target genes associated with the detected causal variants and several pathways that were significantly over-represented by these genes, shedding light on their potential roles in prostate cancer development and progression.

**Keywords:** fine-mapping, global-local shrinkage prior, causal variant, prostate cancer

## 1 Introduction

2 Genome-wide association studies (GWAS) have discovered numerous genetic variants  
3 associated with a wide range of complex traits and diseases [1]. However, pinpointing  
4 the specific variants that have causal effects on the traits is challenging due to the  
5 presence of high linkage disequilibrium (LD) among single nucleotide polymorphisms  
6 (SNPs) and their small effect sizes [2–4]. The goal of statistical fine-mapping is to  
7 identify the causal variants that have nonzero effects on the trait, which is essentially  
8 a statistical problem known as “variable selection”. Since it is difficult to distinguish a  
9 causal variant from other variants highly correlated with it without extra information,  
10 penalized regression methods sometimes fail to select the true causal variants [5]. On  
11 the other hand, Bayesian methods are more appropriate for fine-mapping by providing  
12 posterior “credible sets” (CSs) [4]. A level  $1 - \alpha$  CS is defined as a set of variants that  
13 contains at least one causal variant with posterior probability no less than  $1 - \alpha$  [6, 7].  
14 A CS may contain multiple highly correlated candidate causal variants for further  
15 functional validation.

16 To date, many Bayesian fine-mapping methods have been developed, including  
17 CAVIAR [2], CAVIARBF [5], PAINTOR [3], JAM [8], DAP [9], FINEMAP [10, 11],  
18 and SuSiE [12]. All these methods are based on discrete mixture priors, specifying a  
19 prior probability for each variant being causal. Suppose there are  $M$  SNPs in the region  
20 of interest, the number of possible models is  $2^M$ . To reduce computational cost, these  
21 methods need to set limit on the maximum number of causal variants. However, mis-  
22 specifying the number may lead to decrease in performance [12]. In addition, existing  
23 methods rely on exhaustive search, shotgun stochastic search, or stepwise selection to  
24 explore the space of causal configurations, which can be time-consuming or lead to  
25 poor suboptimal solutions [6, 12].

26 In Bayesian analysis, there is another class of shrinkage priors termed “continu-  
27 ous global-local shrinkage priors”. Existing continuous priors have been shown to be  
28 efficient variable selection tools [13–20] and have been successfully applied in genetic  
29 studies, including polygenic risk prediction [21]. However, continuous shrinkage priors  
30 are hardly used in fine-mapping. One shortcoming of continuous priors is that they  
31 require additional procedures in order to perform variable selection, as the posterior  
32 mean of regression coefficients is not sparse almost surely. Existing approaches include  
33 hard thresholding methods [15, 22], penalized credible regions [23, 24], and posterior  
34 variable selection summary [25]. Nonetheless, these approaches can only produce a  
35 single sparse model instead of several candidate models, and cannot generate credible  
36 sets similar to those obtained using discrete mixture priors.

37 In this paper, we introduce a novel fine-mapping method based on a continuous  
38 global-local shrinkage prior, called the heritability-induced Dirichlet decomposition  
39 (h2-D2) prior, which is a variant of R2-D2 prior [20]. R2-D2 prior possesses both  
40 unbounded density around the origin and very heavy tails, thus enabling it to model  
41 the extremely sparse structure of the fine-mapping coefficients. Our proposed h2-D2  
42 prior inherits the same desirable properties as R2-D2 and is adapted specifically to  
43 GWAS data. Without loss of generality, we will refer to our method, which represents  
44 for the entire fine-mapping process, as h2-D2 throughout the manuscript.

45 Moreover, in order to address the limitations of continuous priors, inspired by the  
46 principles of frequentist hypothesis testing, we propose a statistic, termed “credible  
47 level”, which can be easily computed from posterior samples, to quantify how likely one  
48 or a set of SNPs have nonzero effects. We further define credible sets in the framework  
49 of continuous priors, offering a selection of candidate variants in the post-selection  
50 process.

51 Our simulation studies show that h2-D2 has better performance in identifying  
52 causal variants and accurately estimating effect sizes than the state-of-art fine-mapping  
53 methods such as SuSiE and FINEMAP. The CSs produced by h2-D2 exhibit superior  
54 power and achieve the target level of coverage when accurate LD matrices are pro-  
55 vided. Finally, we apply h2-D2 to prostate cancer GWAS, identifying some novel causal  
56 signals that were not previously reported. The identified credible causal variants show  
57 significant enrichment in active gene regulatory regions and binding sites of specific  
58 transcription factors. In addition, we infer a total of 385 likely target genes associated  
59 with these credible causal variants. These genes are significantly over-represented in  
60 several pathways, providing valuable insights into the potential biological mechanisms  
61 underlying prostate cancer development and progression. We conclude with a discus-  
62 sion of future topics and further describe our software tool h2-D2 to implement the  
63 method for public use.

## 64 Material and methods

### 65 Overview of h2-D2

66 For a GWAS of quantitative trait with  $N$  individuals, consider a region containing  $M$   
67 variants. The relationship between phenotypes and genotypes can be modeled by a  
68 multiple linear regression model:

$$\mathbf{y} = \mathbf{X}\boldsymbol{\beta} + \boldsymbol{\varepsilon}, \quad (\text{Equation 1})$$

69 where  $\mathbf{y}$  is a vector of standardized phenotype values for  $N$  individuals,  $\mathbf{X}$  is an  
70  $N \times M$  column-standardized genotype matrix for  $N$  individuals and  $M$  variants,  $\boldsymbol{\beta} =$   
71  $(\beta_1, \dots, \beta_M)^\top$  is an  $M$ -vector of effect sizes to be estimated, and  $\boldsymbol{\varepsilon}$  is an  $N$ -vector of  
72 error terms. We assume that  $\boldsymbol{\varepsilon} \sim N_N(\mathbf{0}, \sigma_\varepsilon^2 \mathbf{I}_N)$ , where  $\mathbf{I}_N$  is an  $N \times N$  identity matrix  
73 and  $N_k(\boldsymbol{\mu}, \boldsymbol{\Lambda})$  denotes the  $k$ -variate normal distribution with mean  $\boldsymbol{\mu}$  and covariance  
74 matrix  $\boldsymbol{\Lambda}$ .

75 We introduce a prior for  $\boldsymbol{\beta}$  satisfying  $E(\boldsymbol{\beta}) = \mathbf{0}$  and  $\text{Var}(\boldsymbol{\beta}) = \boldsymbol{\Sigma}$ , where  $\boldsymbol{\Sigma}$  is  
76 an  $M \times M$  diagonal matrix with diagonal elements  $\sigma_1^2, \dots, \sigma_M^2$ . The narrow-sense  
77 heritability  $h^2$  of the quantitative trait explained by the  $M$  SNPs can be expressed as

$$\begin{aligned} h^2 &= \frac{\text{Var}(\mathbf{X}\boldsymbol{\beta})}{\text{Var}(\mathbf{y})} = \text{Var}(\mathbf{X}\boldsymbol{\beta}) \\ &= E(\boldsymbol{\beta}^\top \mathbf{R}\boldsymbol{\beta}) = \text{tr}(\mathbf{R}\boldsymbol{\Sigma}) = \sum_{j=1}^M \sigma_j^2 \leq 1, \end{aligned} \quad (\text{Equation 2})$$

78 where  $\mathbf{R}$  is the linkage disequilibrium (LD) matrix of the  $M$  variants. Then  $\sigma_j^2$  can be  
79 interpreted as the per-variant heritability of variant  $j$ .

80 To achieve an ideal prior that shrinks most elements of  $\boldsymbol{\beta}$  toward 0 while retaining  
81 some large coefficients, we impose a Dirichlet prior on the variance terms:

$$(\sigma_1^2, \dots, \sigma_M^2, 1 - h^2) \sim \text{Dir}(a_1, \dots, a_M, b), \quad (\text{Equation 3})$$

82 where  $a_1, \dots, a_M \in (0, 1)$  and  $b > 0$  are hyperparameters. Additionally, a double-  
83 exponential prior is assigned to each element of  $\boldsymbol{\beta}$ :

$$\beta_j | \sigma_j^2 \sim \text{DE}\left(\sqrt{\sigma_j^2/2}\right), \quad j = 1, \dots, M, \quad (\text{Equation 4})$$

84 where  $\text{DE}(\delta)$  denotes a double-exponential distribution with mean 0 and variance  $2\delta^2$ .

85 Same as many other fine-mapping methods, h2-D2 requires GWAS summary  
86 data only [26]. Assume the single-SNP summary statistics  $D = \{\hat{\beta}_j, \hat{e}_j\}_{j=1}^M$   
87 are provided, where  $\hat{\beta}_j$  is the marginal effect size estimate of SNP  $j$ , and  $\hat{e}_j$  is its stan-  
88 dard error. Let  $\hat{\boldsymbol{\beta}} = (\hat{\beta}_1, \dots, \hat{\beta}_M)^\top$ ,  $\hat{s}_j = \left(\hat{e}_j^2 + N^{-1}\hat{\beta}_j^2\right)^{1/2}$  for  $j = 1, \dots, M$ , and  
89  $\hat{\mathbf{S}} = \text{diag}(\hat{s}_1, \dots, \hat{s}_M)$ . The LD matrix is estimated from some reference panel as  $\hat{\mathbf{R}}$ .  
90 The RSS likelihood of  $\hat{\boldsymbol{\beta}}$  [26] is given by

$$\hat{\boldsymbol{\beta}} | \mathbf{D}, \hat{\mathbf{S}}, \hat{\mathbf{R}} \sim N_M\left(\hat{\mathbf{S}}\hat{\mathbf{R}}\hat{\mathbf{S}}^{-1}\boldsymbol{\beta}, \hat{\mathbf{S}}\hat{\mathbf{R}}\hat{\mathbf{S}}\right). \quad (\text{Equation 5})$$

91 The h2-D2 prior can also be applied to binary traits by considering the observed-  
92 scale heritability (supplemental method 1). An MCMC algorithm that is compatible  
93 with both quantitative traits and binary traits is developed to obtain samples from  
94 the posterior distribution (supplemental method 2).

## 95 Credible level and credible set

96 For the  $j$ -th SNP, consider the null hypothesis  $H_{0j} : \beta_j = 0$ . In the frequentist frame-  
97 work,  $H_{0j}$  can be rejected at the level of  $\alpha$  if 0 is not contained in a confidence interval  
98 at the level of  $1 - \alpha$ . We migrate this approach to the Bayesian framework by replacing  
99 the confidence interval with the Bayesian credible interval. We propose the following  
100 statistic to evaluate how likely SNP  $j$  is causal:

$$\text{CL}_j \triangleq \left| \widehat{\text{Pr}}(\beta_j > 0 | D) - \widehat{\text{Pr}}(\beta_j < 0 | D) \right| \in [0, 1], \quad (\text{Equation 6})$$

101 where the posterior probability  $\widehat{\text{Pr}}(\cdot | D)$  is estimated from the MCMC samples. We  
102 term this statistic as the ‘‘credible level’’ of SNP  $j$ , since it can be interpreted as the  
103 maximum probability such that the corresponding equal-tailed credible interval of  $\beta_j$   
104 doesn’t cover 0.

105 Next, we extend this concept to multiple SNPs and define credible sets (CSs)  
106 accordingly. Consider a set of SNPs  $\mathcal{C} = \{j_1, \dots, j_k\}$ . In the frequentist framework,

107 claiming that  $\mathcal{C}$  is a level  $1 - \alpha$  CS is equivalent to rejecting the null hypothesis  
 108  $H_{0\mathcal{C}} : \beta_{\mathcal{C}} \triangleq (\beta_{j_1}, \dots, \beta_{j_k})^\top = \mathbf{0}$  at the significance level of  $\alpha$ , which can be declared if  
 109 the null hypothesis  $\mathbf{v}^\top \beta_{\mathcal{C}} = 0$  can be rejected at the significance level of  $\alpha$  for at least  
 110 one  $\mathbf{v} \in \mathbb{R}^k$ . Therefore, the credible level of  $\mathcal{C}$  is defined as

$$\begin{aligned} \widetilde{\text{CL}}_{\mathcal{C}} &\triangleq \max_{\mathbf{v} \in \mathbb{R}^k} \text{CL}_{\mathcal{C}}(\mathbf{v}) \\ &= \max_{\mathbf{v} \in \mathbb{R}^k} \left| \widehat{\text{Pr}}(\mathbf{v}^\top \beta_{\mathcal{C}} > 0 | D) - \widehat{\text{Pr}}(\mathbf{v}^\top \beta_{\mathcal{C}} < 0 | D) \right|. \end{aligned} \quad (\text{Equation 7})$$

111 However, it is computationally infeasible to find the  $\mathbf{v}$  that maximize the credible  
 112 level when the number of variants exceeds two. Instead, we choose a single  $\mathbf{v}$  to pro-  
 113 vide a lower bound of the credible level. The coefficients of  $\mathbf{v}$  are selected to satisfy  
 114 the condition that for positively correlated variants in  $\mathcal{C}$ , the corresponding coeffi-  
 115 cients have the same signs, while for negatively correlated variants, the corresponding  
 116 coefficients have different signs. We choose  $\mathbf{v}$  as an eigenvector of  $\widehat{\mathbf{R}}_{\mathcal{C}}$  corresponding  
 117 to its largest eigenvalue, where  $\widehat{\mathbf{R}}_{\mathcal{C}}$  denotes the estimated LD matrix of SNPs in  $\mathcal{C}$ . If  
 118  $\text{CL}_{\mathcal{C}}(\mathbf{v}) \geq 1 - \alpha$ , we have  $\widetilde{\text{CL}}_{\mathcal{C}} \geq 1 - \alpha$ , and we conclude that  $\mathcal{C}$  is a level  $1 - \alpha$  credible  
 119 set. A greedy algorithm is designed to search all CSs achieving a pre-specified level  
 120 (supplemental method 3).

## 121 Choice of hyper-parameters

122 In the Dirichlet prior (Equation 3), a smaller  $a_j$  leads to a higher concentration around  
 123 0 for  $\beta_j$ , while a larger  $b$  indicates stronger global shrinkage. When incorporating  
 124 external information, such as functional annotations, if the  $j$ -th SNP is more likely  
 125 to be causal, a larger  $a_j$  can be set. By default, we suggest setting  $a_1 = \dots = a_M =$   
 126  $a \in [0.001, 0.01]$  for general fine-mapping tasks. A smaller  $a$  would make the MCMC  
 127 chain converge slowly, while a larger  $a$  can be considered if there are evidences that  
 128 the region may harbor a large number of causal variants (e.g. more than 10).

129 As for the choice of  $b$ , if an in-sample or highly accurate LD matrix  $\widehat{\mathbf{R}}$  is available,  
 130 we recommend estimating the local heritability using some well-known estimation  
 131 procedures, such as the HESS estimator [27], which is defined as:

$$\widehat{h}^2 = \frac{N \widehat{\beta}^\top \widehat{\mathbf{R}}^{-1} \widehat{\beta} - M}{N - M}. \quad (\text{Equation 8})$$

132 Then,  $b$  can be chosen as follows:

$$b = \frac{(1 - \widehat{h}^2) \sum_{j=1}^M a_j}{\widehat{h}^2}. \quad (\text{Equation 9})$$

133 However, if the accuracy of  $\widehat{\mathbf{R}}$  is poor, the HESS estimator may exhibit large bias. In  
 134 this scenario, even if the true heritability is known, setting  $b$  according to Equation  
 135 9 can lead to large effect size estimates for some non-causal variants in h2-D2. This  
 136 is consistent with a recent finding that significant miscalibration due to external LD

137 matrices can produce suspicious results in meta-analysis fine-mapping studies [28]. To  
138 address this, we suggest performing quality-control to filter out outlier variants before  
139 fine-mapping, and setting  $b \in \left[10^4 \sum_{j=1}^M a_j, 2 \times 10^5 \sum_{j=1}^M a_j\right]$  for GWAS fine-mapping  
140 tasks or setting  $b \in \left[10 \sum_{j=1}^M a_j, 200 \sum_{j=1}^M a_j\right]$  for eQTL fine-mapping tasks.

## 141 UK Biobank data preprocessing

142 We selected British individuals from the UK Biobank database based on specific cri-  
143 teria. The selection process involved the following steps: (i) Only individuals with  
144 available genotype data were included. (ii) We specifically chose individuals who self-  
145 identified as "White British" to ensure homogeneity in the population. (iii) Genetic  
146 sex was confirmed to be consistent with self-reported sex. (iv) Outlier individuals were  
147 identified and excluded based on heterozygosity or missingness. (v) Individuals with  
148 close familial relationships were removed to avoid any potential bias in the analysis.  
149 After applying these filtering criteria, a total of 275,768 individuals were retained for  
150 further analysis.

151 Subsequently, we focused on variants that met the following criteria: (i) Variants  
152 with at most one alternative allele were considered to ensure simplicity in the analy-  
153 sis. (ii) Variants with a minor allele frequency of at least 1% were selected to ensure  
154 a reasonable frequency of the variant in the population. (iii) Variants with an infor-  
155 mation score of at least 0.8 were included to ensure high-quality genotype data.. The  
156 rsID of selected variants were labeled based on dbSNP database (build 151).

## 157 Partition LD blocks

158 We noticed that the LD blocks partitioned by LDetect [29] based on 1000 Genome  
159 reference panel are not optimal for UKBB reference panel. We developed a method  
160 to divide the whole genome into nearly independent LD blocks, so as to improve  
161 computational efficiency and achieve accurate fine-mapping results.

For a given LD matrix  $\hat{\mathbf{R}}$  of  $M$  SNPs, we defined the optimal splitting as the  
solution to the following optimization problem:

$$\arg \min_{k \in \{1, \dots, M\}} \frac{\sum_{1 \leq j_1 \leq k, k < j_2 \leq M} r_{j_1 j_2}^2}{k(M-k)},$$

162 i.e., minimizing the average squared correlation  $r^2$  between two blocks. Our algorithm  
163 iteratively identifies optimal splitting points between consecutive LD blocks obtained  
164 from LDetect. If the loss in optimal splitting, defined as the difference in the objective  
165 function value before and after the split, is smaller than 0.001 and the size of the split  
166 block is not smaller than 50, the split point is accepted. This process is performed  
167 recursively for each split block until no further split points satisfying the conditions  
168 can be found.

169 As a result, we divided the entire autosomal region (excluding the major histo-  
170 compatibility complex [MHC] regions) into a total of 3,717 nearly independent LD

171 blocks. We provide the script and the full list of LD blocks on our GitHub repos-  
172 itory at <https://github.com/xiangli428/PrCaFineMapping>. This approach allows for  
173 improved efficiency and accuracy in fine-mapping analyses using the UK Biobank  
174 reference panel.

## 175 Simulations

176 We conducted simulation studies using UK Biobank imputed genotype data from  
177  $N = 275,768$  unrelated British individuals [30]. For the simulations, we selected 100  
178 nearly independent LD blocks on chromosome 2 (Table S1), and included variants  
179 with  $\text{MAF} \geq 0.01$  and INFO score  $\geq 0.8$ . We pruned SNPs such that the absolute  
180 correlation  $|r|$  between any two SNPs was less than 0.99. Each block contained a  
181 varying number of SNPs, ranging from 288 to 1,122, and had a length between 0.25  
182 and 2 Mb.

183 We designed four simulation scenarios with varying sample sizes, local heritabili-  
184 ties, and numbers causal variants. For the first three scenarios, we used the genotypes  
185 of all  $N = 275,768$  individuals and considered different combinations of local heri-  
186 tability and numbers of causal variants: (1)  $h^2 = 0.1\%$ ,  $n_{\text{causal}} = 5$ ; (2)  $h^2 = 0.05\%$ ,  
187  $n_{\text{causal}} = 5$ ; and (3)  $h^2 = 0.1\%$ ,  $n_{\text{causal}} = 10$ . In the last scenario, we simulated eQTL  
188 studies, where the sample sizes were small ( $N = 1,000$ ), but the effect sizes of causal  
189 SNPs were large ( $h^2 = 10\%$ ), and  $n_{\text{causal}} = 5$ . Genotype values of each SNP were  
190 standardized. In each scenario, for each block, the causal variants were chosen ran-  
191 domly and the effect sizes of causal variants were sampled from a normal distribution  
192 with mean 0. The phenotype values were then computed according to the multiple  
193 regression model (Equation 1), where the error term  $\boldsymbol{\varepsilon}$  were sampled from a multi-  
194 variate normal distribution with mean  $\mathbf{0}$  and covariance matrix  $\sigma_{\varepsilon}^2 \mathbf{I}_N$ .  $\sigma_{\varepsilon}^2$  was chosen  
195 such that  $\text{Var}(\mathbf{X}\boldsymbol{\beta}) / (\text{Var}(\mathbf{X}\boldsymbol{\beta}) + \sigma_{\varepsilon}^2)$  equaled  $h^2$  in each scenario. After standardiz-  
196 ing the phenotype values and scaling the effect sizes of causal variants consistently,  
197 we computed summary statistics for each variant.

198 To assess the influence of LD matrix accuracy on the fine-mapping performance,  
199 we computed four LD matrices for each block. The first one was an in-sample LD  
200 matrix computed from all 275,768 UKBB individuals ( $\widehat{\mathbf{R}}$ ). The second one and the  
201 third one were down-sample LD matrices, computed from randomly sampled 3,000  
202 or 500 UKBB individuals, denoted by  $\widehat{\mathbf{R}}_{\text{UKBB},3000}$  and  $\widehat{\mathbf{R}}_{\text{UKBB},500}$ , respectively. The  
203 fourth one was an out-of-sample LD matrix computed from 522 unrelated European  
204 ancestry individuals using the genotype data from the 1,000 Genomes Project on  
205 GRCh38 [31, 32], denoted by  $\widehat{\mathbf{R}}_{\text{1KG}}$ . When using mismatched LD matrices, we applied  
206 SLALOM to all pairs of SNPs with  $|r| \geq 0.8$  and remove outlier non-causal variants  
207 with DENTIST-S statistics  $\geq 40$  [28].

## 208 Compared methods

209 We performed a comprehensive comparison between h2-D2 and two state-of-art fine-  
210 mapping methods requiring only summary statistics, FINEMAP [10, 11] and SuSiE-  
211 RSS [12]. FINEMAP utilizes a general discrete distribution as prior for the number of  
212 causal SNPs,

$$\Pr(\text{number of causal SNPs is } k) = p_k, k = 1, \dots, K,$$

213 where  $K \ll M$  is the maximum number of causal variants, and uses a shotgun stochastic  
214 search algorithm to identify models with high posterior probabilities. SuSiE [6] is  
215 a novel variable selection method that decomposes the effect size as the sum of single-  
216 effect vectors and imposes a multinomial prior distribution on each single-effect vector.  
217 SuSiE adopts an iterative Bayesian stepwise selection algorithm to optimize a varia-  
218 tional approximation to the posterior distribution, as well as a refinement procedure  
219 to address the convergence problem of the algorithm.

220 As for the choices of hyper-parameters, for h2-D2, we set  $a_1 = \dots = a_M = a =$   
221  $0.005$ . When using LD matrices  $\hat{\mathbf{R}}$  or  $\hat{\mathbf{R}}_{\text{UKBB},3000}$ , we set  $b$  according to Equation 8  
222 and Equation 9. When using  $\hat{\mathbf{R}}_{\text{UKBB},500}$  or  $\hat{\mathbf{R}}_{\text{1KG}}$ , we set  $b = 2 \times 10^5 M a$  for scenario  
223 1-3, and  $100 M a$  for scenario 4, respectively. For SuSiE, we set options “refine=TRUE”  
224 and “estimate\_residual\_variance=TRUE”. For both SuSiE and FINEMAP, we set the  
225 number of single-effect vectors or the maximum number of causal variants equals the  
226 true number of causal variants in each scenario (5 or 10).

## 227 Comparison of causal variant effect sizes and their posterior 228 mean in simulation studies

229 In each simulation setting, we merged the results from 100 datasets together. Since  
230 causal variants with small effect sizes are difficult to be identified by fine-mapping  
231 methods, we used the following piecewise linear model to assess the relationship  
232 between the true effect sizes ( $\beta$ ) of causal SNPs and their posterior means ( $\bar{\beta}$ ):

$$\bar{\beta} = \begin{cases} k(\beta - \beta_0) & \text{for } \beta > \beta_0, \\ 0 & \text{for } |\beta| \leq \beta_0, \\ k(\beta + \beta_0) & \text{for } \beta < -\beta_0, \end{cases} \quad (\text{Equation 10})$$

233 where  $k$  and  $\beta_0 > 0$  are the coefficients to be estimated. We used least square method  
234 to estimate these coefficients. The fitted curves are shown in Figure S4.

## 235 Prostate cancer GWAS data preprocessing

236 We applied h2-D2 to identify candidate causal variants of prostate cancer (PrCa)  
237 using summary GWAS data from a large meta-analysis involving  $N_1 = 79,148$  cases  
238 and  $N_0 = 61,106$  controls of European ancestry [33]. We excluded the major histo-  
239 compatibility complex MHC region (chr6 25-33 M) from our analysis. The remaining  
240 autosomal regions were partitioned into 3,717 nonoverlapping regions with approxi-  
241 mately independent LD (Material and methods). There are 126 risk variants out of  
242 3,717 regions (i.e., contain at least one SNP with  $P < 5 \times 10^{-8}$ ). 275,768 unrelated  
243 British individuals from UK Biobank database were used as reference panel.

244 We filtered out duplicated SNPs, SNPs that were not present in UKBB reference  
245 panel, SNPs with a imputation  $r^2 < 0.3$ , with a standard error of marginal effect size  
246 on the allelic scale  $< 5 \times 10^{-3}$  or  $> 10^{-2}$ , with a  $\text{MAF} < 0.01$  in UKBB reference panel,  
247 or with a  $\text{logit}(\text{MAF})$  difference between UKBB reference panel and meta-analysis



248 larger than 0.5. Since mismatched LD matrices were used, to avoid unreliable results,  
249 for each pair of SNPs with an absolute correlation  $|r| \geq 0.8$ , we checked if the pattern  
250 of LD and GWAS summary statistics is suspicious using DENTIST-S statistic [28]. If  
251 DENTIST-S statistic was greater than or equal to 30, the less significant SNP would  
252 be removed. After these quality control steps, 6, 446, 747 common SNPs were retained  
253 in our analysis. Before fine-mapping, the variants were pruned such that all pairwise  
254 correlation  $|r| < 0.95$ . A total of 1, 342, 667 tag SNPs were retained for fine-mapping.  
255 We used h2-D2 with specific hyper-parameters ( $a_1 = \dots a_M = 0.005$  and  $b = 2 \times 10^5$ )  
256 to fine-map each region and identify 95% CSs. Each 95% CS includes a set of tag  
257 SNPs with a joint credible level  $\geq 0.95$ , as well as the pruned SNPs that are in high  
258 LD with them.

## 259 Annotations of variants

260 The gene-based annotations of variants and their associated genes were extracted from  
261 the dbSNP database (build 151) with GRCh37.p13 as the reference assembly [34].  
262 These annotations include: NSF (non-synonymous frameshift), NSM (non-synonymous  
263 missense), NSN (non-synonymous nonsense), SYN (synonymous), U3 (in 3' UTR), U5  
264 (in 5' UTR), ASS (in acceptor splice site), DSS (in donor splice-site), INT (in intron),  
265 R3 (in 3' gene region), and R5 (in 5' gene region).

266 Prostate cancer-specific cis- and trans-eQTL data were obtained from PancanQTL  
267 database [35]. Cis-eQTLs from normal prostate tissues mapped in European-American  
268 subjects were obtained from GTEx V8 database [36].

269 DNaseI peaks, ChIP-seq peaks of histone marks and transcription factor binding  
270 sites in prostate-derived cell lines were obtained from Cistrome database [37]. Details  
271 of downloaded data are shown in Table S3. The peak coordinates were converted from  
272 hg38 to hg19 reference assembly using LiftOver. Variants located within these peaks  
273 were selected using BEDTools.

274 Enhancer-promoter loops identified from Hi-C data in RWPE1, C42B, and 22Rv1  
275 cell lines were obtained from Supplementary Table 5A-C of ref. [38]. Annotated  
276 H3K27ac HiChIP loops in LNCaP cell line were obtained from Table S7 of ref. [39].  
277 Variants located within the identified enhancers were selected using BEDTools.

## 278 Pathway enrichment analysis

279 Potential target genes of credible causal variants (CCVs) were derived by merging (i)  
280 associated genes of CCVs annotated in dbSNP database (build 151); (ii) associated  
281 genes of eQTLs in CCVs in PancanQTL and GTEx V8 databases; (iii) genes whose  
282 promoters interact with enhancers covering CCVs in Hi-C or H3K27ac HiChIP data.  
283 Protein-coding genes were retained based on GENCODE v42 annotations mapped to  
284 GRCh37 assembly.

285 Enrichment analyses for pathways from GO Biological Process [40] and WikiPath-  
286 ways [41] were carried out using GeneCodis [42]. To remove redundant pathways, we  
287 computed Dice coefficients for all pairs of pathways. If the Dice coefficient between  
288 two pathways is larger than 0.3, only the more significant one was retained.

## 289 Results

### 290 Simulation results

291 We conducted simulation studies to evaluate the performance of h2-D2 and compared  
292 it with other fine-mapping methods. In brief, we chose 100 regions on chromosome  
293 2 (Table S1) and simulated quantitative traits for each region. We considered four  
294 scenarios with varying sample sizes, local heritabilities, and numbers causal variants.  
295 To examine the influence of LD matrix accuracy on the fine-mapping performance, we  
296 computed four LD matrices from different reference panels with varying sample sizes  
297 for each block. Details are provided in [Material and methods](#).

298 We compared h2-D2 with two state-of-art fine-mapping methods, FINEMAP  
299 [10, 11] and SuSiE-RSS [12]. On the SNP level, we evaluated the performance of vari-  
300 able selection using the area under the precision-recall curve (AUPRC), which was  
301 computed based on the credible level of each SNP for h2-D2 or the marginal poste-  
302 rior inclusion probability (PIP) of each SNP for SuSiE and FINEMAP. In addition,  
303 we assessed the accuracy of effect size estimation using the sum of squared error  
304 (SSE) of  $\beta$  based on its posterior mean. When using in-sample LD matrices, h2-D2  
305 consistently outperformed SuSiE and FINEMAP in terms of both AUPRC and SSE  
306 across all scenarios (Figure 1A,B). As expected, all methods exhibited degraded per-  
307 formance as the accuracy of the LD matrices decreased. In most cases, h2-D2 still  
308 demonstrated superior performance. Additionally, h2-D2's credible levels were bet-  
309 ter calibrated than PIPs of SuSiE and FINEMAP, particularly when inaccurate LD  
310 matrices were used (Figure S1). The performance of SuSiE was close to that of h2-  
311 D2. However, FINEMAP had significantly larger SSE and performed much worse in  
312 Scenario 3 where the true number of causal variants was 10.

313 To gain further insights into the differences among the three methods, we compared  
314 the AUPRC for each simulated dataset between h2-D2 and the other two methods  
315 (Figure S2). While the AUPRC values were generally close for all three methods across  
316 most datasets, h2-D2 exhibited significantly better performance in certain datasets. By  
317 visualizing the fine-mapping results of these datasets, we noticed that in many cases  
318 if there was a non-causal SNP having moderate LD with one or more causal SNPs  
319 and having a stronger marginal association than causal SNPs, SuSiE and FINEMAP  
320 tended to select that non-causal SNP instead of the causal ones. Figure S3 provides  
321 two examples illustrating this issue. This phenomenon may be attributed to the step-  
322 wise selection nature of SuSiE and the shotgun stochastic search algorithm employed  
323 by FINEMAP. Once a marginally significant variant is included in the model, it is dif-  
324 ficult for discrete-mixture prior-based methods to remove it, i.e., the algorithms are  
325 more prone to be trapped into suboptimal solutions. It appears that the refinement  
326 step of SuSiE cannot always alleviate this problem. On the other hand, continu-  
327 ous shrinkage prior-based methods allow for the continuous updating of coefficients,  
328 enabling smoother transitions among different local modes, and making the Markov  
329 Chain Monte Carlo (MCMC) algorithm to explore the space of causal configurations  
330 more extensively.

331 We also compared differences among the three methods in effect size estimation. We  
332 grouped the variants into causal and non-causal categories and analysed the prediction

333 error for each group ([Material and methods](#), Figures S4 and S5). Although SuSiE and  
334 h2-D2 produced similar estimation of causal variant effect sizes, h2-D2 had smaller  
335 prediction errors for the non-causal variant effect sizes, suggesting that h2-D2 had  
336 lower FDR than SuSiE. While FINEMAP demonstrated the lowest SSE for non-causal  
337 variant effect sizes, it grossly underestimated causal variant effect sizes, presumably  
338 from excessive shrinkage, resulting in larger SSE compared with SuSiE and h2-D2.

339 Next, we compared the level 95% CSs produced by the three methods. As shown in  
340 Figure 1C-G, when using  $\hat{R}$  or  $\hat{R}_{UKBB,3000}$ , the numbers of 95% CSs generated by the  
341 three methods were comparable, and CSs from h2-D2 exhibited higher coverage and  
342 greater power in most cases. When using  $\hat{R}_{UKBB,500}$  or  $\hat{R}_{1KG}$ , SuSiE and FINEMAP  
343 detected more CSs with higher power but lower coverage, while h2-D2 detected fewer  
344 CSs with lower power but higher coverage. These results suggested that the CSs from  
345 h2-D2 have a lower false discovery rate (FDR) even when low accuracy LD matrices are  
346 used. Although the CSs based on continuous priors may not guarantee the frequentist  
347 coverage, we found that the coverage was generally higher or close to the target level  
348 of 0.95, except when using  $\hat{R}_{1KG}$ . It is not surprising that 95% CSs from h2-D2 had  
349 larger sizes and lower purity, since SuSiE and FINEMAP focus on regions with high  
350 posterior probability density and select "best candidates" among a set of SNPs in high  
351 LD. In contrast, h2-D2 samples from the full posterior distribution, providing a more  
352 comprehensive representation of the uncertainty in the fine-mapping results.

353 Finally, we compared runtime of the three methods (Figure 1H). The computa-  
354 tional complexity of h2-D2 is proportional to  $M^2$  (where  $M$  is the number of variants)  
355 and the number of MCMC iterations ( $n_{MCMC}$ ), while the computational complexity  
356 of SuSiE is proportional to  $M^2$  and the maximum number of single effects  $L$ . When  
357  $n_{MCMC} = 10000$  and  $L = 5$ , the runtime of h2-D2 were approximately three times as  
358 long as the runtime of SuSiE. The computational complexity of FINEMAP is primarily  
359 determined by the maximum number of causal variants and the number of iterations,  
360 so the runtime of FINEMAP didn't significantly vary with the number of variants.

## 361 Fine-mapping causal variants of prostate cancer

362 We applied h2-D2 to identify candidate causal variants of prostate cancer (PrCa) using  
363 summary GWAS data from a large meta-analysis of European ancestry [33] ([Material  
364 and methods](#)). Overall, we identified 164 CSs at 95% level (Table S2), containing  
365 4,706 credible causal variants (366 tags). Among these CSs, 93 overlapped with the  
366 106 CSs in autosomal risk loci reported by ref. [43] and 86 overlapped with the CSs  
367 identified by ref. [39]. Out of the 3,717 regions analysed, 92 regions contained a single  
368 CS, while 23 regions contained multiple CSs. 6 CSs were detected within non-risk  
369 regions. The region with the highest number of CSs was chr8 127708268-128658961,  
370 where 15 CSs were detected. This finding is consistent with previous research that  
371 chr8q24 region harbors multiple loci associated with PrCa susceptibility [44]. The  
372 sizes of the CSs ranged from 1 to 282 variants, with a median size of 12 variants.  
373 There were 22 CSs containing only a single variant, including some well-established  
374 causal variants of PrCa, such as rs77559646, which disrupts *ANO7* mRNA splicing  
375 and protein expression [45], and rs61752561, which affects glycosylation and function  
376 of prostate-specific antigen [46] (Table 1).

**Table 1** Single-SNP credible sets of prostate cancer causal variants

| Fine-mapping region <sup>1</sup> | Variant <sup>2</sup> | rsID <sup>3</sup> | AAF <sup>4</sup> | P value <sup>5</sup>    | CL <sup>6</sup> | Target gene(s) <sup>7</sup>   | Association type(s) <sup>8</sup>          |
|----------------------------------|----------------------|-------------------|------------------|-------------------------|-----------------|-------------------------------|-------------------------------------------|
| chr2:62482371-64700760           | 2.63301164_C_A       | rs6545977         | 0.50             | $7.35 \times 10^{-46}$  | 1               |                               |                                           |
| chr2:241912029-243041411         | 2.242135265_G_A      | rs77559646        | 0.02             | $9.93 \times 10^{-21}$  | 1               | <i>ANO7</i>                   | NSM <sup>9</sup> ,INT <sup>10</sup>       |
| chr3:169194244-170170389         | 3.170083629_C_G      | rs61436251        | 0.21             | $1.76 \times 10^{-63}$  | 1               | <i>SKIL</i>                   | INT                                       |
| chr5:1279701-1551138             | 5.1287194_G_A        | rs2853677         | 0.58             | 0.02                    | 1               | <i>TERT</i>                   | INT                                       |
| chr5:1279701-1551138             | 5.1288547_T_C        | rs2853676         | 0.73             | $8.86 \times 10^{-12}$  | 1               | <i>TERT</i>                   | INT                                       |
| chr5:1279701-1551138             | 5.1292118_G_A        | rs71595003        | 0.03             | $1.78 \times 10^{-16}$  | 0.96            | <i>TERT</i>                   | INT                                       |
| chr5:1279701-1551138             | 5.1298017_G_A        | rs148297846       | 0.07             | $4.98 \times 10^{-15}$  | 0.97            |                               |                                           |
| chr5:1551930-2131681             | 5.1895829_C_T        | rs12653946        | 0.42             | $9.58 \times 10^{-22}$  | 1               | <i>IRX4</i>                   | INT,Cis eQTL (GTEx)                       |
| chr6:159951830-161847113         | 6.160581374_A_G      | rs651164          | 0.69             | $2.15 \times 10^{-36}$  | 1               | <i>SOD2,ACAT2,TCPI,MRPL18</i> | Enhancer (H3K27ac)<br>HiChIP, LNCaP       |
| chr6:159951830-161847113         | 6.160581502_T_C      | rs4646283         | 0.14             | $1.31 \times 10^{-5}$   | 0.99            | <i>SOD2,ACAT2,TCPI,MRPL18</i> | Enhancer (H3K27ac)<br>HiChIP, LNCaP       |
| chr8:127708268-128658961         | 8.128540776_C_G      | rs12549761        | 0.12             | $5.20 \times 10^{-77}$  | 1               |                               |                                           |
| chr8:128659713-129297518         | 8.128665480_C_T      | rs4385433         | 0.37             | $6.91 \times 10^{-8}$   | 0.96            |                               |                                           |
| chr10:50839567-53146331          | 10.51549496_T_C      | rs10993994        | 0.62             | $2.29 \times 10^{-147}$ | 1               | <i>TMM23B,MSMB,NCOA4</i>      | INT,R5 <sup>11</sup> ,<br>Cis eQTL (GTEx) |
| chr11:124697216-125111546        | 11.125054793_C_T     | rs138466039       | 0.01             | $2.01 \times 10^{-11}$  | 1               | <i>PKNOX2</i>                 | INT,Cis eQTL (GTEx)                       |
| chr12:12101106-12922339          | 12.12871099_T_G      | rs2066827         | 0.24             | $2.31 \times 10^{-9}$   | 1               | <i>CDKN1B</i>                 | NSM,R3 <sup>12</sup>                      |
| chr13:73847474-74347673          | 13.74084684_G_A      | rs61957204        | 0.07             | $3.29 \times 10^{-11}$  | 1               |                               |                                           |
| chr14:23251130-23598976          | 14.23305649_T_C      | rs1004030         | 0.42             | $1.55 \times 10^{-8}$   | 0.98            | <i>MMP14</i>                  | R5                                        |
| chr17:7251713-8007416            | 17.7571752_T_G       | rs78378222        | 0.01             | $1.73 \times 10^{-9}$   | 1               | <i>TP53</i>                   | U3 <sup>13</sup>                          |
| chr17:45308047-47211560          | 17.46816630_C_A      | rs189183876       | 0.01             | 0.27                    | 1               |                               |                                           |
| chr17:45308047-47211560          | 17.46832497_C_T      | rs146240770       | 0.02             | 0.05                    | 1               |                               |                                           |
| chr19:51254187-51450534          | 19.51361382_G_A      | rs61752561        | 0.04             | $2.33 \times 10^{-8}$   | 1               | <i>KLK3</i>                   | NSM,INT                                   |
| chr22:42872086-43649657          | 22.43500212_G_T      | rs5759167         | 0.50             | $5.55 \times 10^{-71}$  | 1               |                               |                                           |

<sup>1</sup>Chromosome (chr) number and boundary of fine-mapping region (GRCh37/hg19).

<sup>2</sup>Variant ID in the format {chr}-{pos}-{ref.seq}-{alt.seq}.

<sup>3</sup>dbSNP (build 151, GRCh37/hg19) rsID.

<sup>4</sup>Alternative allele frequency of controls in meta-analysis.

<sup>5</sup>Meta-analysis p-value.

<sup>6</sup>h2-D2 redible level.

<sup>7</sup>Putative target gene(s) of the variant.

<sup>8</sup>Association type(s) between the variant and its putative target gene(s).

<sup>9</sup>Non-synonymous missense.

<sup>10</sup>In Intron.

<sup>11</sup>In 5' gene region.

<sup>12</sup>In 3' gene region.

<sup>13</sup>In 3' UTR.

377 In our analysis, we identified some novel independent association signals that have  
378 not been previously reported. One such example is chr11 68810837-69542062, where  
379 four 95% CSs were detected (Figure 2A, Figure S6A). CS:11-88-1 is represented by  
380 rs12275055 ( $P = 3.7 \times 10^{-98}$ ), which is known to have pleiotropic associations with  
381 multiple cancer types [47]. This SNP acts as an eQTL in multiple tissues for *TPCN2*,  
382 which plays a role in autophagy progression and extracellular vesicle secretion in cancer  
383 cells [48]. The location of CS:11-88-2 overlaps with CS:11-88-1. Hi-C data from the  
384 normal prostate cell line RWPE1 indicated that several SNPs within CS:11-88-2 are  
385 located in an enhancer region that looping to the promoter of the cell cycle related  
386 gene *CCND1* [38]. Furthermore, an interaction between the *TPCN2* promoter and the  
387 *CCND1* promoter was detected by H3K27ac HiChIP in the LNCaP prostate cancer cell  
388 line [39]. These findings suggest a possible mechanism involving a three-way interaction  
389 between an enhancer harboring the causal SNPs in CS:11-88-1 and CS:11-88-2, the  
390 *TPCN2* promoter, and the *CCND1* promoter. We also identified two other CSs, CS:11-  
391 88-3 and CS:11-88-4, near the gene *CCND1*. Within CS:11-88-3, 4 out of 17 variants  
392 are located in the 5' flanking region of *CCND1*. In CS:11-88-4, the most likely causal  
393 variant is the lead SNP rs3212870 ( $P = 1.5 \times 10^{-3}$ ), which is located intronic in  
394 *CCND1*. The associations between CS:11-88-4 and PrCa have not been previously  
395 reported, because of the weak marginal associations, which can be explained by the  
396 moderate LD between CS:11-88-1, CS:11-88-2, and CS:11-88-4 (Figure S6A). Another  
397 interesting example is chr4 73256856-74885359 (Figure 2B, Figure S6B), where we  
398 identified a novel CS, CS:4-88-3, insignificantly associated with PrCa (minimum  $P =$   
399  $6.5 \times 10^{-4}$ ). The lead SNP in CS:4-88-3, rs72649118, is a non-synonymous missense  
400 SNP of *RASSF6*, a member of the RASSF family of tumor suppressors [49].

## 401 **Functional enrichment of prostate cancer credible causal** 402 **variants**

403 We used the hypergeometric tests to investigate the enrichment of credible causal  
404 variants (CCVs) in specific genomic features, including prostate-specific DNaseI hyper-  
405 sensitivity sites, ChIP-seq peaks of transcription factors and histone marks ([Material](#)  
406 [and methods](#), Table S3). We observed significant enrichment of CCVs in active reg-  
407 ulatory regions (defined by H3K27ac and H3K4me1 marks), active gene promoters  
408 (defined by H3K4me3 and H3K9ac marks), actively transcribed gene bodies (defined  
409 by H3K36me3 and H3K79me2 marks), and DNaseI hypersensitivity sites (Figure 3A).  
410 CCVs were also significantly enriched in the binding sites of various transcription fac-  
411 tors (Figure 3B, Table S3), including *AR* (androgen receptor), *NR3C1* (glucocorticoid  
412 receptor), *ASH2L*, and *FOXA1*.

413 To formally evaluate the relationship between the biological functions associated  
414 with SNPs and their contributions to the risk of PrCa, we fitted a linear model for the  
415 logarithm of per-SNP heritability (i.e., the posterior mean of squared effect size) of all  
416 1, 342, 667 tag SNPs using the following functional annotations of SNPs as predictors:  
417 (i) 11 gene-based annotations extracted from the dbSNP database (build 151) [34];  
418 (ii) cis- and trans-eQTLs within PrCa tissues from the TCGA database [35]; (iii) cis-  
419 eQTLs within normal prostate tissues from the GTEx v8 database [36]; (iv) DNaseI

420 hypersensitivity sites, ChIP-seq peaks of 48 transcription factors and 9 histone modifi-  
421 cations from normal prostate or prostate cancer cell lines, obtained from the Cistrome  
422 Data Browser [37]; (v) enhancer elements identified by Hi-C data and H3K27ac ChIP-  
423 seq peaks in normal prostate (RWPE1) and prostate cancer (C42B and 22Rv1) cell  
424 lines [38]; (vi) enhancer elements predicted by H3K27ac HiChIP in the prostate cancer  
425 cell line LNCaP [39]. In addition,  $\log(f(1-f))$  and  $\log(\text{LD score})$  were included as  
426 covariates, where  $f$  is the minor allele frequency of SNP. This analysis revealed that  
427 cis-eQTL (TCGA) ( $P_{\text{adj}} = 5.4 \times 10^{-137}$ ), cis-eQTL (GTEx) ( $P_{\text{adj}} = 8.2 \times 10^{-52}$ ), and  
428 enhancer (H3K27ac HiChIP, LNCaP) ( $P_{\text{adj}} = 1.8 \times 10^{-50}$ ) were the most significant  
429 three annotations associated with per-SNP heritability (Figure 3C, Table S4). Trans-  
430 eQTL (TCGA) ( $P_{\text{adj}} = 1.5 \times 10^{-8}$ ) exhibited the largest effect size (0.36). Notably,  
431 HDAC1 (histone deacetylase 1) binding site was the only significant functional anno-  
432 tation with a negative effect on per-SNP heritability. These findings suggested that  
433 genetic variants influencing gene expression levels and enhancer activity play a crucial  
434 role in the development and progression of PrCa.

### 435 Putative target genes of prostate cancer credible causal variants

436 To identify potential target genes of CCVs, we integrated various sources of infor-  
437 mation, including gene-based annotations from the dbSNP database (build 151),  
438 eQTL data, and enhancer-promoter interaction data from Hi-C and HiChIP experi-  
439 ments (Material and methods). As a result, we identified 385 protein-coding genes as  
440 potential target genes of CCVs across all 95% CSs (Figure 4A, Table S2).

441 We further conducted pathway enrichment analysis to gain insights into the biolog-  
442 ical functions and processes associated with these putative target genes. Our analysis  
443 revealed significant over-representation of these genes in 52 non-redundant pathways  
444 at an FDR of 0.05 (Figure 4B, Table S5). Notable enriched pathways included prostate  
445 gland development, DNA damage response (only ATM dependent), positive regula-  
446 tion of transcription by RNA polymerase II, and regulation of mitotic cell cycle. The  
447 enrichment of putative target genes in cellular response to BMP (bone morphogenetic  
448 protein) stimulus, collagen catabolic process, and definitive hemopoiesis pathways may  
449 be attributed to the involvement of these processes in PrCa bone metastasis [50–  
450 52]. Furthermore, putative target genes were also over-represented in toxin transport  
451 pathway. Although previous studies have reported associations between PrCa and sev-  
452 eral genes in toxin transport pathway, such as *SLC22A1–A3* [53, 54], the relationship  
453 between PrCa and this pathway is not well elucidated and needs further investigation.

## 454 Discussion

455 In this article, we present h2-D2, a fine-mapping method that utilizes a continuous  
456 global-local shrinkage prior. As an extension of R2-D2, h2-D2 is designed for GWAS  
457 data where the phenotype values are standardized. Unlike existing fine-mapping meth-  
458 ods that rely on discrete mixture priors, h2-D2 does not impose a constraint on the  
459 maximum number of causal variants and allows for the exploration of a wider range  
460 of causal configurations. In addition, h2-D2 does not rely on assumptions regard-  
461 ing the distribution of causal variant effect sizes, compatible with infinitesimal effect

462 assumption for non-causal variants, which has been adopted by some recent works in  
463 fine-mapping [55, 56]. These features ensure the applicability and flexibility of h2-D2  
464 in various scenarios.

465 We develop an efficient MCMC algorithm for h2-D2 to sample from the posterior  
466 distribution. We utilize several strategies to accelerate the mixing of MCMC chains,  
467 allowing for a more extensive exploration of the model space. Simulation studies show  
468 that h2-D2 is less likely to get trapped into local optima and performs better in variable  
469 selection than discrete-mixture-prior-based methods including SuSiE and FINEMAP.  
470 This may be due to the property of continuous priors that the coefficients are updated  
471 continuously and the transitions among local modes can be smoothly. Our results also  
472 highlight the importance of using accurate LD matrices derived from adequately large  
473 reference panels, which concurs with previous discoveries [12, 57].

474 Another important contribution of our work is that we propose an inference  
475 approach to define credible sets in the framework of continuous priors, which addresses  
476 the limitation of continuous priors that do not yield selection results directly. Sim-  
477 ulation studies show that the CSs produced by h2-D2 can achieve the target level  
478 of coverage and are well-powered when using in-sample LD matrices, and exhibit an  
479 improved control of FDR when using mismatched LD matrices. These results suggest  
480 the robustness and effectiveness of our proposed approach. Theoretical properties of  
481 the credible level defined for multiple SNPs deserve further investigation. Addition-  
482 ally, we acknowledge that the greedy search algorithm used to identify credible sets  
483 may not always yield the optimal sets and may miss some sets (supplemental method  
484 3). Further refinement and improvement of the algorithm are needed to enhance its  
485 performance.

486 In the real data application on prostate cancer GWAS, we identified several novel  
487 signals that have not been previously reported. Variants in 95 % CSs are significantly  
488 over-represented in prostate-specific epigenetic marks associated with activation of  
489 gene transcription. Through integrating gene-based annotation of SNPs, eQTL, Hi-  
490 C, and HiChIP data in prostate cell lines, we identified 385 potential target genes of  
491 variants in 95 % CSs. These genes are enriched in prostate development and cancer  
492 related pathways.

493 As a future direction, fine-mapping resolutions may be improved by integrating  
494 functional annotations into the h2-D2 prior. Stratified LD score regression-based meth-  
495 ods like PolyFun [58] are well suited to be incorporated with h2-D2, since h2-D2  
496 prior is imposed on the per-SNP heritability directly. Furthermore, h2-D2 can also be  
497 extended to multi-trait fine-mapping. Given the widespread existence of pleiotropy,  
498 fine-mapping multiple traits simultaneously has the potential to enhance the power  
499 of identifying shared causal variants among traits [59–61]. Jointly analyzing multiple  
500 traits may provide valuable insights into the genetic architecture underlying complex  
501 diseases and traits, and improve our understanding of the shared genetic basis between  
502 different phenotypes.

## 503 Data and code availability

504 Prostate cancer summary data are available from the PRACTICAL Consor-  
505 tium ([http://practical.icr.ac.uk/blog/?page\\_id=8164](http://practical.icr.ac.uk/blog/?page_id=8164)). Enhancer-promoter loops iden-  
506 tified from Hi-C data in RWPE1, C42B, and 22Rv1 cell lines are available  
507 at [https://static-content.springer.com/esm/art%3A10.1038%2Fs41467-019-12079-8/  
508 MediaObjects/41467\\_2019\\_12079\\_MOESM7\\_ESM.xlsx](https://static-content.springer.com/esm/art%3A10.1038%2Fs41467-019-12079-8/MediaObjects/41467_2019_12079_MOESM7_ESM.xlsx). Annotated H3K27ac HiChIP  
509 loops in LNCaP cell line are available at [https://ars.els-cdn.com/content/image/1-s2.  
510 0-S0002929721004195-mm3.csv](https://ars.els-cdn.com/content/image/1-s2.0-S0002929721004195-mm3.csv). The software h2D2 is available at [https://github.  
511 com/xiangli428/h2D2](https://github.com/xiangli428/h2D2). Scripts and data related to PrCa fine-mapping analysis are  
512 available at <https://github.com/xiangli428/PrCaFineMapping>.

## 513 Acknowledgments

514 This work was supported, in part, by the Hong Kong Research Grants Council (RGC)  
515 Early Career Scheme 2021/22 (project number 27305221).

## 516 Declaration of interests

517 The authors declare no competing interests.

## 518 Web resources

519 UK Biobank, <https://www.ukbiobank.ac.uk/>  
520 1000 Genomes on GRCh38, <https://www.internationalgenome.org/>  
521 Prostate cancer summary data, [http://practical.icr.ac.uk/blog/?page\\_id=8164](http://practical.icr.ac.uk/blog/?page_id=8164)  
522 dbSNP (build 151) with GRCh37.p13 as reference assembly, [https://ftp.ncbi.nih.  
523 gov/snp/organisms/human\\_9606\\_b151\\_GRCh37p13/](https://ftp.ncbi.nih.gov/snp/organisms/human_9606_b151_GRCh37p13/)  
524 PancanQTL, [http://gong\\_lab.hzau.edu.cn/PancanQTL/](http://gong_lab.hzau.edu.cn/PancanQTL/)  
525 GTEx V8, <https://gtexportal.org/home/>  
526 Cistrome, <http://cistrome.org/>  
527 plink, <https://zzz.bwh.harvard.edu/plink/>  
528 BEDTools, <https://bedtools.readthedocs.io/en/latest/>  
529 LDetect, <https://bitbucket.org/nygresearch/ldetect/src/master/>  
530 bigsnpr, <https://privefl.github.io/bigsnpr/>  
531 GeneCodis, <https://genecodis.genyo.es/>  
532 FINEMAP, <http://christianbenner.com/>  
533 SuSiE, <https://github.com/stephenslab/susieR>



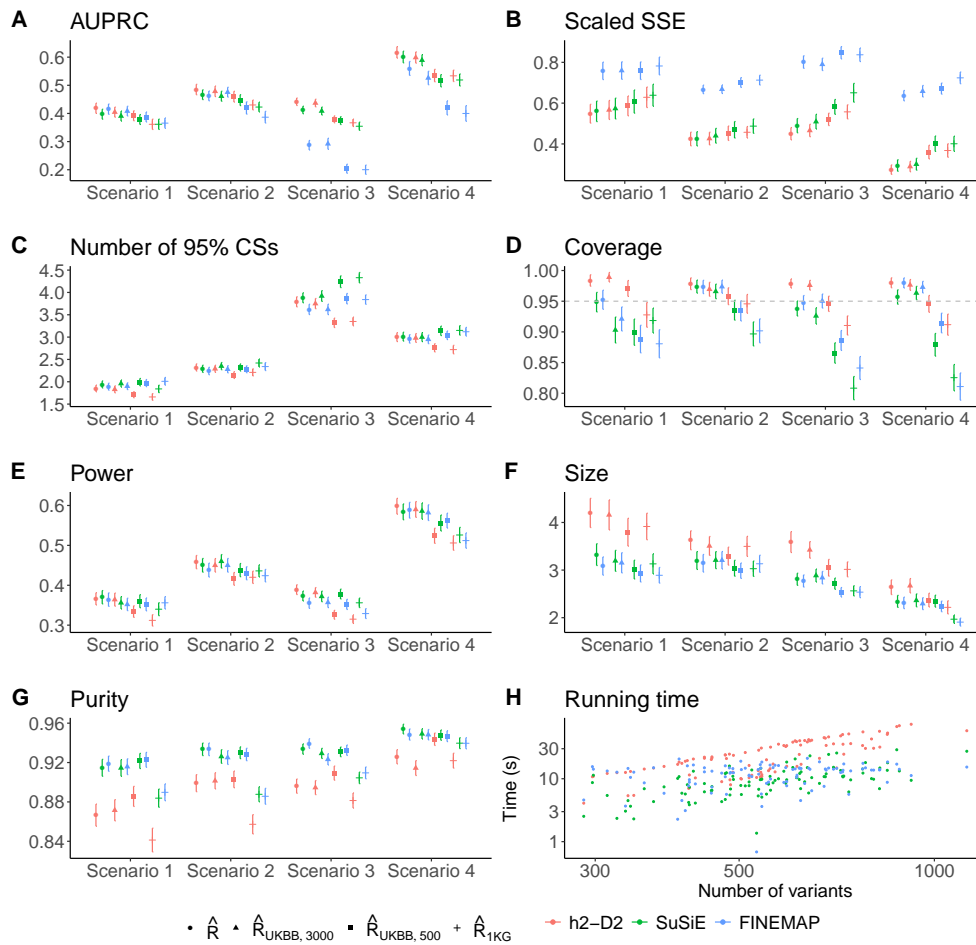

**Figure 1 Performance comparison of h2-D2, SuSiE and FINEMAP on simulated data.**

In A-G, all values are the average ones across 100 datasets, with standard errors indicated by the error bars. (A) Area under the precision-recall curve (AUPRC) based on the credible level of each SNP for h2-D2 or the marginal posterior inclusion probability (PIP) of each SNP for SuSiE and FINEMAP. (B) Sum of squared error (SSE) of  $\beta$  based on its posterior mean, scaled by  $h^2$  in each scenario. (C) Number of detected 95% credible sets (CSs). (D) Coverage of 95% CS (the proportion of CSs that capture at least one causal variant). (E) Power of 95% CS (the proportion of causal variants captured by at least one CS). (F) Size of 95% CS (the number of variants in each CS). (G) Purity of 95% CS (the minimum absolute correlation among all pairs of SNPs in each CS). (H) Running time of the three methods against the number of variants in scenario 1. Each point represents a simulated dataset. For h2-D2, MCMC ran 10,000 iterations. For SuSiE,  $L = 5$ . For FINEMAP,  $K = 5$ .

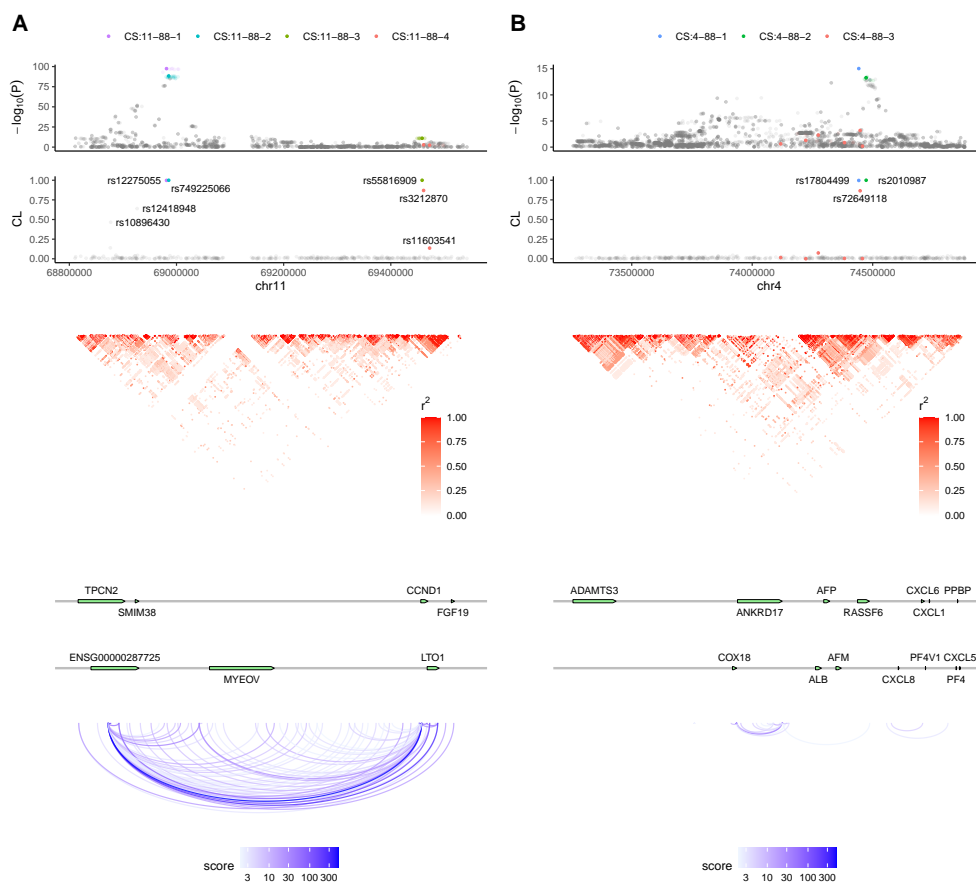

**Figure 2 Fine-mapping results of two genomic regions in prostate cancer data analysis.** (A) chr11 68810837-69542062; (B) chr4 73256856-74885359. The top panel depicts the marginal associations of variants ( $-\log_{10}(P)$ ) from the GWAS meta-analysis data. The second panel illustrates the credible levels of tag SNPs computed by h2-D2. In the first two panels, each color represents a 95% credible set (CS). The CS is named in the format CS:{chromosome ID}-{region ID}-{index}. The third panel demonstrates the patterns of linkage disequilibrium of the genomic region. The fourth panel displays the positions of genes in the corresponding regions. The bottom panel shows the H3K27ac HiChIP loops detected in the LNCaP prostate cancer cell line [39].

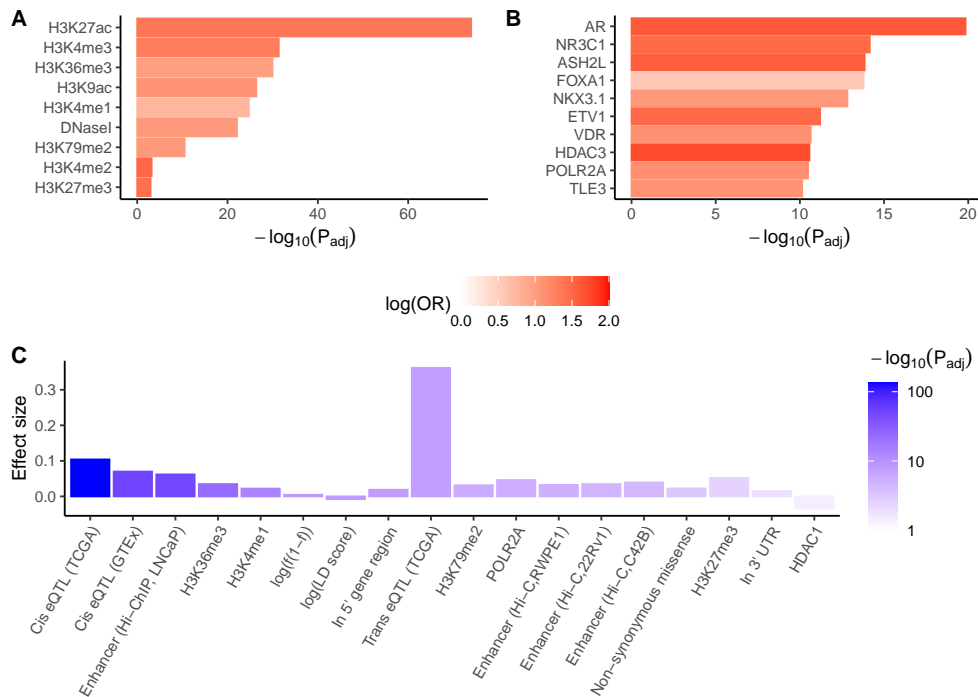

**Figure 3** (A,B) Enrichment of credible causal variants in prostate-specific (A) histone marks and DNaseI hypersensitivity sites (B) top 10 transcription factor binding sites. Hypergeometric test  $P$  values are adjusted using the Benjamini-Hochberg (BH) method. (C) A linear regression model is fitted for the logarithm of per-SNP heritabilities of tag SNPs using the functional annotations of tag SNPs as predictors. Effect sizes and adjusted  $P$  values of significant functional annotations are shown.  $P$  values are adjusted using the BH method. Significance is defined as  $P_{adj} < 0.05$ .

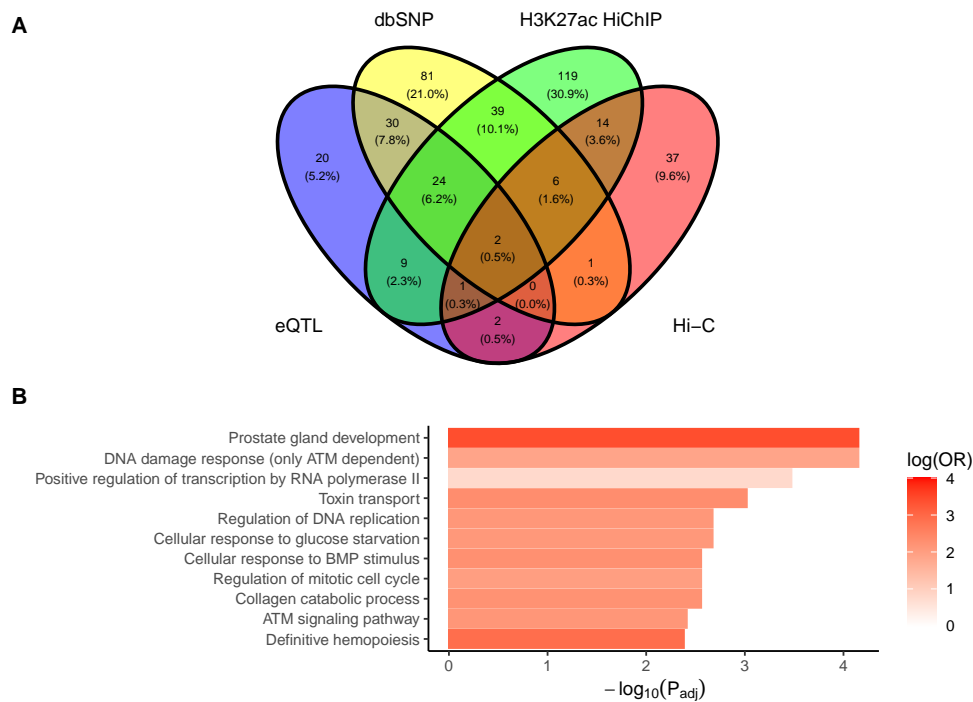

**Figure 4** (A) Venn diagram showing the numbers of putative target genes inferred from different sources of information. (B) Enrichment of putative target genes in pathways from Gene Ontology Biological Processes and WikiPathways. Hypergeometric test  $P$  values are adjusted using the BH method. Pathways with  $P_{adj} < 0.005$  are shown.

## References

- [1] Buniello, A., MacArthur, J.A.L., Cerezo, M., Harris, L.W., Hayhurst, J., Malan-gone, C., McMahon, A., Morales, J., Mountjoy, E., Sollis, E., *et al.*: The nhgri-ebi gwasc catalog of published genome-wide association studies, targeted arrays and summary statistics 2019. *Nucleic acids research* **47**(D1), 1005–1012 (2019)
- [2] Hormozdiari, F., Kostem, E., Kang, E.Y., Pasaniuc, B., Eskin, E.: Identifying causal variants at loci with multiple signals of association. *Genetics* **198**(2), 497–508 (2014)
- [3] Kichaev, G., Yang, W.-Y., Lindstrom, S., Hormozdiari, F., Eskin, E., Price, A.L., Kraft, P., Pasaniuc, B.: Integrating functional data to prioritize causal variants in statistical fine-mapping studies. *PLoS genetics* **10**(10), 1004722 (2014)
- [4] Schaid, D.J., Chen, W., Larson, N.B.: From genome-wide associations to candi-date causal variants by statistical fine-mapping. *Nature Reviews Genetics* **19**(8), 491–504 (2018)
- [5] Chen, W., Larrabee, B.R., Ovshynnikova, I.G., Kennedy, R.B., Haralambieva, I.H., Poland, G.A., Schaid, D.J.: Fine mapping causal variants with an approx-imate bayesian method using marginal test statistics. *Genetics* **200**(3), 719–736 (2015)
- [6] Wang, G., Sarkar, A., Carbonetto, P., Stephens, M., *et al.*: A simple new approach to variable selection in regression, with application to genetic fine mapping. *Journal of the Royal Statistical Society Series B* **82**(5), 1273–1300 (2020)
- [7] Maller, J.B., McVean, G., Byrnes, J., Vukcevic, D., Palin, K., Su, Z., Howson, J.M., Auton, A., Myers, S., Morris, A., *et al.*: Bayesian refinement of associa-tion signals for 14 loci in 3 common diseases. *Nature genetics* **44**(12), 1294–1301 (2012)
- [8] Newcombe, P.J., Conti, D.V., Richardson, S.: Jam: a scalable bayesian framework for joint analysis of marginal snp effects. *Genetic epidemiology* **40**(3), 188–201 (2016)
- [9] Wen, X., Lee, Y., Luca, F., Pique-Regi, R.: Efficient integrative multi-snp associa-tion analysis via deterministic approximation of posteriors. *The American Journal of Human Genetics* **98**(6), 1114–1129 (2016)
- [10] Benner, C., Spencer, C.C., Havulinna, A.S., Salomaa, V., Ripatti, S., Pirinen, M.: Finemap: efficient variable selection using summary data from genome-wide association studies. *Bioinformatics* **32**(10), 1493–1501 (2016)
- [11] Benner, C., Havulinna, A.S., Salomaa, V., Ripatti, S., Pirinen, M.: Refining fine-mapping: effect sizes and regional heritability. *BioRxiv*, 318618 (2018)

- [12] Zou, Y., Carbonetto, P., Wang, G., Stephens, M.: Fine-mapping from summary data with the “sum of single effects” model. *PLoS genetics* **18**(7), 1010299 (2022)
- [13] Park, T., Casella, G.: The bayesian lasso. *Journal of the American Statistical Association* **103**(482), 681–686 (2008)
- [14] Griffin, J.E., Brown, P.J.: Inference with normal-gamma prior distributions in regression problems. *Bayesian Analysis* **5**(1), 171–188 (2010)
- [15] Carvalho, C.M., Polson, N.G., Scott, J.G.: The horseshoe estimator for sparse signals. *Biometrika* **97**(2), 465–480 (2010)
- [16] Armagan, A., Dunson, D.B., Lee, J.: Generalized double pareto shrinkage. *Statistica Sinica* **23**(1), 119 (2013)
- [17] Bhattacharya, A., Pati, D., Pillai, N.S., Dunson, D.B.: Dirichlet–laplace priors for optimal shrinkage. *Journal of the American Statistical Association* **110**(512), 1479–1490 (2015)
- [18] Bhadra, A., Datta, J., Polson, N.G., Willard, B.: The horseshoe+ estimator of ultra-sparse signals. *Bayesian Analysis* **12**(4), 1105–1131 (2017)
- [19] Bai, R., Ghosh, M.: Large-scale multiple hypothesis testing with the normal-beta prime prior. *Statistics* **53**(6), 1210–1233 (2019)
- [20] Zhang, Y.D., Naughton, B.P., Bondell, H.D., Reich, B.J.: Bayesian regression using a prior on the model fit: The r<sup>2</sup>-d<sup>2</sup> shrinkage prior. *Journal of the American Statistical Association* **117**(538), 862–874 (2020)
- [21] Ge, T., Chen, C.-Y., Ni, Y., Feng, Y.-C.A., Smoller, J.W.: Polygenic prediction via bayesian regression and continuous shrinkage priors. *Nature communications* **10**(1), 1–10 (2019)
- [22] ISHWARAN, H., RAO, J.S.: Spike and slab variable selection: Frequentist and bayesian strategies. *The Annals of statistics* **33**(2), 730–773 (2005)
- [23] Bondell, H.D., Reich, B.J.: Consistent high-dimensional bayesian variable selection via penalized credible regions. *Journal of the American Statistical Association* **107**(500), 1610–1624 (2012)
- [24] Zhang, Y., Bondell, H.D.: Variable selection via penalized credible regions with dirichlet-laplace global-local shrinkage priors. *Bayesian Analysis* (2018)
- [25] Hahn, P.R., Carvalho, C.M.: Decoupling shrinkage and selection in bayesian linear models: a posterior summary perspective. *Journal of the American Statistical Association* **110**(509), 435–448 (2015)
- [26] Zhu, X., Stephens, M.: Bayesian large-scale multiple regression with summary

- statistics from genome-wide association studies. *The annals of applied statistics* **11**(3), 1561 (2017)
- [27] Shi, H., Kichaev, G., Pasaniuc, B.: Contrasting the genetic architecture of 30 complex traits from summary association data. *The American Journal of Human Genetics* **99**(1), 139–153 (2016)
- [28] Kanai, M., Elzur, R., Zhou, W., Wu, K.-H.H., Rasheed, H., Tsuo, K., Hirbo, J.B., Wang, Y., Bhattacharya, A., Zhao, H., *et al.*: Meta-analysis fine-mapping is often miscalibrated at single-variant resolution. *Cell genomics* **2**(12), 100210 (2022)
- [29] Berisa, T., Pickrell, J.K.: Approximately independent linkage disequilibrium blocks in human populations. *Bioinformatics* **32**(2), 283 (2016)
- [30] Bycroft, C., Freeman, C., Petkova, D., Band, G., Elliott, L.T., Sharp, K., Motyer, A., Vukcevic, D., Delaneau, O., O’Connell, J., *et al.*: The uk biobank resource with deep phenotyping and genomic data. *Nature* **562**(7726), 203–209 (2018)
- [31] Zheng-Bradley, X., Streeter, I., Fairley, S., Richardson, D., Clarke, L., Flicek, P., Consortium, .G.P.: Alignment of 1000 genomes project reads to reference assembly grch38. *Gigascience* **6**(7), 038 (2017)
- [32] Lowy-Gallego, E., Fairley, S., Zheng-Bradley, X., Ruffier, M., Clarke, L., Flicek, P., Consortium, .G.P., *et al.*: Variant calling on the grch38 assembly with the data from phase three of the 1000 genomes project. *Wellcome Open Research* **4** (2019)
- [33] Schumacher, F.R., Al Olama, A.A., Berndt, S.I., Benlloch, S., Ahmed, M., Saunders, E.J., Dadaev, T., Leongamornlert, D., Anokian, E., Cieza-Borrella, C., *et al.*: Association analyses of more than 140,000 men identify 63 new prostate cancer susceptibility loci. *Nature genetics* **50**(7), 928–936 (2018)
- [34] Sherry, S.T., Ward, M.-H., Kholodov, M., Baker, J., Phan, L., Smigielski, E.M., Sirotkin, K.: dbSNP: the ncbi database of genetic variation. *Nucleic acids research* **29**(1), 308–311 (2001)
- [35] Gong, J., Mei, S., Liu, C., Xiang, Y., Ye, Y., Zhang, Z., Feng, J., Liu, R., Diao, L., Guo, A.-Y., *et al.*: Pancanqtl: systematic identification of cis-eQTLs and trans-eQTLs in 33 cancer types. *Nucleic acids research* **46**(D1), 971–976 (2018)
- [36] Consortium, G.: The GTEx Consortium atlas of genetic regulatory effects across human tissues. *Science* **369**(6509), 1318–1330 (2020)
- [37] Liu, T., Ortiz, J.A., Taing, L., Meyer, C.A., Lee, B., Zhang, Y., Shin, H., Wong, S.S., Ma, J., Lei, Y., *et al.*: Cistrome: an integrative platform for transcriptional regulation studies. *Genome biology* **12**(8), 1–10 (2011)
- [38] Rhie, S.K., Perez, A.A., Lay, F.D., Schreiner, S., Shi, J., Polin, J., Farnham, P.J.:

- A high-resolution 3d epigenomic map reveals insights into the creation of the prostate cancer transcriptome. *Nature communications* **10**(1), 4154 (2019)
- [39] Giambartolomei, C., Seo, J.-H., Schwarz, T., Freund, M.K., Johnson, R.D., Spisak, S., Baca, S.C., Gusev, A., Mancuso, N., Pasaniuc, B., *et al.*: H3k27ac hichip in prostate cell lines identifies risk genes for prostate cancer susceptibility. *The American Journal of Human Genetics* **108**(12), 2284–2300 (2021)
- [40] Ashburner, M., Ball, C.A., Blake, J.A., Botstein, D., Butler, H., Cherry, J.M., Davis, A.P., Dolinski, K., Dwight, S.S., Eppig, J.T., *et al.*: Gene ontology: tool for the unification of biology. *Nature genetics* **25**(1), 25–29 (2000)
- [41] Martens, M., Ammar, A., Riutta, A., Waagmeester, A., Slenter, D.N., Hanspers, K., A. Miller, R., Digles, D., Lopes, E.N., Ehrhart, F., *et al.*: Wikipathways: connecting communities. *Nucleic acids research* **49**(D1), 613–621 (2021)
- [42] García-Moreno, A., López-Domínguez, R., Ramirez-Mena, A., Pascual-Montano, A., Aparicio-Puerta, E., Hackenberg, M., Carmona-Saez, P.: Genecodis 4: Expanding the modular enrichment analysis to regulatory elements. *bioRxiv*, 2021–04 (2021)
- [43] Dadaev, T., Saunders, E.J., Newcombe, P.J., Anokian, E., Leongamornlert, D.A., Brook, M.N., Cieza-Borrella, C., Mijuskovic, M., Wakerell, S., Olama, A.A.A., *et al.*: Fine-mapping of prostate cancer susceptibility loci in a large meta-analysis identifies candidate causal variants. *Nature communications* **9**(1), 1–19 (2018)
- [44] Al Olama, A.A., Kote-Jarai, Z., Giles, G.G., Guy, M., Morrison, J., Severi, G., Leongamornlert, D.A., Tymrakiewicz, M., Jhavar, S., Saunders, E., *et al.*: Multiple loci on 8q24 associated with prostate cancer susceptibility. *Nature genetics* **41**(10), 1058–1060 (2009)
- [45] Wahlström, G., Heron, S., Knuuttila, M., Kaikkonen, E., Tulonen, N., Metsälä, O., Löf, C., Ettala, O., Boström, P.J., Taimen, P., *et al.*: The variant rs77559646 associated with aggressive prostate cancer disrupts ano7 mrna splicing and protein expression. *Human Molecular Genetics* **31**(12), 2063–2077 (2022)
- [46] Srinivasan, S., Stephens, C., Wilson, E., Panchadsaram, J., DeVoss, K., Koistinen, H., Stenman, U.-H., Brook, M.N., Buckle, A.M., Klein, R.J., *et al.*: Prostate cancer risk-associated single-nucleotide polymorphism affects prostate-specific antigen glycosylation and its function. *Clinical chemistry* **65**(1), 1–9 (2019)
- [47] Rashkin, S.R., Graff, R.E., Kachuri, L., Thai, K.K., Alexeeff, S.E., Blatchins, M.A., Cavazos, T.B., Corley, D.A., Emami, N.C., Hoffman, J.D., *et al.*: Pan-cancer study detects genetic risk variants and shared genetic basis in two large cohorts. *Nature communications* **11**(1), 4423 (2020)
- [48] Sun, W., Yue, J.: Tpc2 mediates autophagy progression and extracellular vesicle



- secretion in cancer cells. *Experimental cell research* **370**(2), 478–489 (2018)
- [49] Allen, N., Donniger, H., Vos, M., Eckfeld, K., Hesson, L., Gordon, L., Birrer, M., Latif, F., Clark, G.: Rassf6 is a novel member of the rassf family of tumor suppressors. *Oncogene* **26**(42), 6203–6211 (2007)
- [50] Paiva, A.E., Lousado, L., Almeida, V.M., Andreotti, J.P., Santos, G.S., Azevedo, P.O., Sena, I.F., Prazeres, P.H., Borges, I.T., Azevedo, V., *et al.*: Endothelial cells as precursors for osteoblasts in the metastatic prostate cancer bone. *Neoplasia* **19**(11), 928–931 (2017)
- [51] Xu, S., Xu, H., Wang, W., Li, S., Li, H., Li, T., Zhang, W., Yu, X., Liu, L.: The role of collagen in cancer: from bench to bedside. *Journal of translational medicine* **17**, 1–22 (2019)
- [52] Decker, A., Jung, Y., Cackowski, F., Taichman, R.: The role of hematopoietic stem cell niche in prostate cancer bone metastasis. *Journal of Bone Oncology* **5**(3), 117–120 (2016)
- [53] Tomlins, S.A., Mehra, R., Rhodes, D.R., Cao, X., Wang, L., Dhanasekaran, S.M., Kalyana-Sundaram, S., Wei, J.T., Rubin, M.A., Pienta, K.J., *et al.*: Integrative molecular concept modeling of prostate cancer progression. *Nature genetics* **39**(1), 41–51 (2007)
- [54] Grisanzio, C., Werner, L., Takeda, D., Awoyemi, B.C., Pomerantz, M.M., Yamada, H., Sooriakumaran, P., Robinson, B.D., Leung, R., Schinzel, A.C., *et al.*: Genetic and functional analyses implicate the nudt11, hnf1b, and slc22a3 genes in prostate cancer pathogenesis. *Proceedings of the National Academy of Sciences* **109**(28), 11252–11257 (2012)
- [55] Cui, R., Elzur, R.A., Kanai, M., Ulirsch, J.C., Weissbrod, O., Daly, M., Neale, B., Fan, Z., Finucane, H.K.: Improving fine-mapping by modeling infinitesimal effects. *BioRxiv*, 2022–10 (2022)
- [56] Cai, M., Wang, Z., Xiao, J., Hu, X., Chen, G., Yang, C.: Xmap: Cross-population fine-mapping by leveraging genetic diversity and accounting for confounding bias. *bioRxiv*, 2023–03 (2023)
- [57] Benner, C., Havulinna, A.S., Järvelin, M.-R., Salomaa, V., Ripatti, S., Pirinen, M.: Prospects of fine-mapping trait-associated genomic regions by using summary statistics from genome-wide association studies. *The American Journal of Human Genetics* **101**(4), 539–551 (2017)
- [58] Weissbrod, O., Hormozdiari, F., Benner, C., Cui, R., Ulirsch, J., Gazal, S., Schoech, A.P., Van De Geijn, B., Reshef, Y., Márquez-Luna, C., *et al.*: Functionally informed fine-mapping and polygenic localization of complex trait heritability. *Nature genetics* **52**(12), 1355–1363 (2020)

- [59] Hernández, N., Soenksen, J., Newcombe, P., Sandhu, M., Barroso, I., Wallace, C., Asimit, J.: The flashfm approach for fine-mapping multiple quantitative traits. *Nature Communications* **12**(1), 6147 (2021)
- [60] Arvanitis, M., Tayeb, K., Strober, B.J., Battle, A.: Redefining tissue specificity of genetic regulation of gene expression in the presence of allelic heterogeneity. *The American Journal of Human Genetics* **109**(2), 223–239 (2022)
- [61] Zou, Y., Carbonetto, P., Xie, D., Wang, G., Stephens, M.: Fast and flexible joint fine-mapping of multiple traits via the sum of single effects model. *bioRxiv*, 2023–04 (2023)

During the preparation of this work the authors used ChatGPT in order to improve the expression. After using this tool/service, the authors reviewed and edited the content as needed and take full responsibility for the content of the publication.
